# Supplementary material for: A Novel Polyvalent Bacteriophage vB_EcoM_swi3 Infects Pathogenic Escherichia coli and Salmonella enteritidis
Source: PubMed Central journal article supplement (PMC8317433; doi:10.3389/fmicb.2021.649673), 2021-07-14
Supplement: Table_1.pdf [file Table_1.pdf]

**Table S1****EOP of phage swi3 in 65 *E. coli* strains and 72 *S. enteritidis* strains**

| Strain name       | Susceptibility results |     |     |     |     |     |     |     | EOP  |
|-------------------|------------------------|-----|-----|-----|-----|-----|-----|-----|------|
|                   | PEN                    | DOX | FFC | ENR | CIP | CTX | NEO | CRO |      |
| <i>E. coli</i> 1  | R                      | I   | S   | R   | S   | S   | R   | S   | -    |
| <i>E. coli</i> 2  | R                      | R   | S   | I   | S   | I   | R   | S   | -    |
| <i>E. coli</i> 3  | R                      | R   | S   | I   | I   | S   | R   | S   | 0.14 |
| <i>E. coli</i> 4  | R                      | R   | I   | S   | S   | I   | R   | S   | -    |
| <i>E. coli</i> 5  | R                      | R   | I   | I   | S   | S   | R   | S   | -    |
| <i>E. coli</i> 6  | R                      | R   | I   | I   | I   | I   | R   | S   | -    |
| <i>E. coli</i> 7  | R                      | R   | I   | I   | S   | S   | R   | S   | -    |
| <i>E. coli</i> 8  | R                      | R   | R   | R   | S   | S   | I   | S   | -    |
| <i>E. coli</i> 9  | R                      | R   | S   | I   | I   | I   | R   | S   | -    |
| <i>E. coli</i> 10 | R                      | R   | S   | I   | S   | I   | I   | S   | -    |
| <i>E. coli</i> 11 | R                      | R   | I   | R   | R   | S   | I   | S   | -    |
| <i>E. coli</i> 12 | R                      | R   | I   | I   | I   | I   | I   | I   | -    |
| <i>E. coli</i> 13 | R                      | R   | R   | I   | S   | R   | I   | S   | -    |
| <i>E. coli</i> 14 | R                      | R   | R   | I   | I   | R   | I   | R   | -    |
| <i>E. coli</i> 15 | R                      | R   | R   | I   | I   | S   | I   | S   | -    |
| <i>E. coli</i> 16 | R                      | R   | R   | R   | I   | S   | R   | S   | -    |
| <i>E. coli</i> 17 | R                      | R   | R   | R   | R   | S   | I   | S   | -    |
| <i>E. coli</i> 18 | R                      | R   | R   | I   | S   | S   | R   | S   | -    |
| <i>E. coli</i> 19 | R                      | R   | R   | R   | I   | S   | R   | S   | -    |
| <i>E. coli</i> 20 | R                      | R   | S   | S   | S   | S   | S   | S   | -    |
| <i>E. coli</i> 21 | R                      | R   | S   | R   | R   | I   | R   | S   | -    |
| <i>E. coli</i> 22 | R                      | R   | R   | R   | S   | I   | R   | S   | -    |
| <i>E. coli</i> 23 | R                      | R   | R   | R   | R   | I   | R   | R   | 0.63 |
| <i>E. coli</i> 24 | R                      | R   | R   | R   | R   | I   | I   | I   | -    |
| <i>E. coli</i> 25 | R                      | R   | R   | R   | R   | R   | R   | R   | -    |
| <i>E. coli</i> 26 | R                      | R   | I   | S   | S   | I   | I   | S   | -    |
| <i>E. coli</i> 27 | R                      | R   | R   | I   | I   | I   | I   | S   | -    |
| <i>E. coli</i> 28 | R                      | R   | I   | I   | R   | I   | I   | I   | -    |
| <i>E. coli</i> 29 | R                      | R   | R   | R   | R   | I   | I   | I   | -    |
| <i>E. coli</i> 30 | R                      | R   | R   | I   | I   | S   | I   | S   | -    |
| <i>E. coli</i> 31 | R                      | R   | R   | R   | R   | S   | R   | I   | -    |
| <i>E. coli</i> 32 | R                      | R   | R   | I   | I   | S   | I   | S   | -    |
| <i>E. coli</i> 33 | R                      | R   | R   | R   | R   | I   | I   | I   | -    |
| <i>E. coli</i> 34 | R                      | R   | R   | S   | S   | S   | R   | S   | -    |
| <i>E. coli</i> 35 | R                      | R   | R   | R   | R   | R   | I   | S   | -    |
| <i>E. coli</i> 36 | R                      | R   | R   | R   | I   | I   | R   | S   | -    |
| <i>E. coli</i> 37 | R                      | R   | I   | R   | R   | I   | I   | I   | -    |
| <i>E. coli</i> 38 | R                      | R   | S   | I   | I   | S   | R   | S   | -    |

|                          |   |   |   |   |   |   |   |   |       |
|--------------------------|---|---|---|---|---|---|---|---|-------|
| <i>E. coli</i> 39        | R | I | I | S | S | I | R | S | -     |
| <i>E. coli</i> 40        | R | R | I | I | S | S | I | R | -     |
| <i>E. coli</i> 41        | R | R | R | I | I | I | R | S | -     |
| <i>E. coli</i> 42        | R | R | I | I | S | S | R | S | 18.75 |
| <i>E. coli</i> 43        | R | R | R | R | S | S | I | I | -     |
| <i>E. coli</i> 44        | R | R | S | I | I | I | R | S | -     |
| <i>E. coli</i> 45        | R | R | S | I | S | I | I | S | -     |
| <i>E. coli</i> 46        | R | R | I | R | R | S | I | S | 1.25  |
| <i>E. coli</i> 47        | R | R | I | I | I | I | R | I | -     |
| <i>E. coli</i> 48        | R | R | R | R | S | R | I | S | -     |
| <i>E. coli</i> 49        | R | R | R | I | I | R | I | R | -     |
| <i>E. coli</i> 50        | R | R | R | I | I | S | R | S | -     |
| <i>E. coli</i> 51        | R | R | S | R | I | S | I | S | -     |
| <i>E. coli</i> 52        | R | R | R | R | R | R | R | S | -     |
| <i>E. coli</i> 53        | R | R | R | I | S | S | I | I | -     |
| <i>E. coli</i> 54        | R | I | S | R | I | S | R | S | -     |
| <i>E. coli</i> 55        | R | R | S | S | S | S | R | R | -     |
| <i>E. coli</i> 56        | R | R | S | R | R | I | S | S | -     |
| <i>E. coli</i> 57        | R | R | R | R | S | R | S | S | -     |
| <i>E. coli</i> 58        | R | R | R | R | R | I | R | R | -     |
| <i>E. coli</i> 59        | R | R | I | R | R | I | I | I | -     |
| <i>E. coli</i> 60        | R | I | R | R | S | R | R | I | -     |
| <i>E. coli</i> 61        | R | R | I | S | S | I | I | I | -     |
| <i>E. coli</i> 62        | R | R | R | I | I | S | I | S | -     |
| <i>E. coli</i> 63        | R | R | I | I | R | I | I | I | -     |
| <i>E. coli</i> 64        | R | R | R | R | R | I | I | I | 0.12  |
| <i>E. coli</i> K88       | R | R | S | S | S | I | S | I | 1     |
| <i>S. enteritidis</i> 1  | R | R | R | I | S | S | R | I | -     |
| <i>S. enteritidis</i> 2  | R | R | R | R | S | I | R | I | -     |
| <i>S. enteritidis</i> 3  | R | R | R | R | S | S | R | I | -     |
| <i>S. enteritidis</i> 4  | R | R | R | S | I | R | R | S | 0.63  |
| <i>S. enteritidis</i> 5  | R | R | S | R | I | S | R | S | -     |
| <i>S. enteritidis</i> 6  | R | R | S | R | I | I | R | S | -     |
| <i>S. enteritidis</i> 7  | R | R | S | R | R | I | R | I | -     |
| <i>S. enteritidis</i> 8  | R | R | I | R | R | I | R | S | 2.66  |
| <i>S. enteritidis</i> 9  | R | R | S | R | R | I | I | S | -     |
| <i>S. enteritidis</i> 10 | R | R | R | S | R | I | I | S | 8.13  |
| <i>S. enteritidis</i> 11 | R | R | R | R | R | S | I | R | -     |
| <i>S. enteritidis</i> 12 | R | R | R | I | R | S | S | R | -     |
| <i>S. enteritidis</i> 13 | R | I | R | R | S | I | S | R | -     |
| <i>S. enteritidis</i> 14 | R | I | R | R | R | I | S | S | -     |
| <i>S. enteritidis</i> 15 | R | I | S | R | R | I | S | S | -     |
| <i>S. enteritidis</i> 16 | R | R | R | R | R | I | R | R | 0.13  |
| <i>S. enteritidis</i> 17 | R | R | R | I | R | S | R | I | 0.66  |

|                          |   |   |   |   |   |   |   |   |      |
|--------------------------|---|---|---|---|---|---|---|---|------|
| <i>S. enteritidis</i> 18 | R | R | R | R | R | S | R | S | 0.47 |
| <i>S. enteritidis</i> 19 | R | R | R | I | S | S | R | S | 0.41 |
| <i>S. enteritidis</i> 20 | R | R | I | S | S | I | R | S | 5.00 |
| <i>S. enteritidis</i> 21 | R | R | I | R | I | I | R | R | 0.13 |
| <i>S. enteritidis</i> 22 | R | R | R | R | I | I | R | R | -    |
| <i>S. enteritidis</i> 23 | R | I | R | R | S | I | I | R | -    |
| <i>S. enteritidis</i> 24 | R | R | R | I | R | I | I | R | 1.56 |
| <i>S. enteritidis</i> 25 | R | R | R | I | S | R | I | S | -    |
| <i>S. enteritidis</i> 26 | R | R | R | S | R | R | I | S | -    |
| <i>S. enteritidis</i> 27 | R | R | R | S | R | I | I | S | 0.09 |
| <i>S. enteritidis</i> 28 | R | R | R | R | I | I | I | S | 3.13 |
| <i>S. enteritidis</i> 29 | R | R | R | R | I | I | I | S | -    |
| <i>S. enteritidis</i> 30 | R | R | S | R | I | I | S | R | 0.78 |
| <i>S. enteritidis</i> 31 | R | R | R | R | S | I | S | R | -    |
| <i>S. enteritidis</i> 32 | R | R | R | R | S | S | S | R | 0.78 |
| <i>S. enteritidis</i> 33 | R | R | R | R | R | S | I | R | 1.13 |
| <i>S. enteritidis</i> 34 | R | R | R | I | R | S | I | S | 1.41 |
| <i>S. enteritidis</i> 35 | R | R | R | R | R | S | I | S | 0.98 |
| <i>S. enteritidis</i> 36 | R | R | R | S | R | I | I | S | -    |
| <i>S. enteritidis</i> 37 | R | R | R | S | R | I | I | R | 0.08 |
| <i>S. enteritidis</i> 38 | R | R | I | I | S | I | I | R | -    |
| <i>S. enteritidis</i> 39 | R | I | R | R | S | I | R | R | 0.11 |
| <i>S. enteritidis</i> 40 | R | I | R | R | S | I | R | S | -    |
| <i>S. enteritidis</i> 41 | R | R | R | R | R | I | R | S | 0.16 |
| <i>S. enteritidis</i> 42 | R | R | R | R | R | I | R | S | 0.09 |
| <i>S. enteritidis</i> 43 | R | R | R | I | R | I | R | I | 0.94 |
| <i>S. enteritidis</i> 44 | R | R | R | S | I | I | R | I | -    |
| <i>S. enteritidis</i> 45 | R | R | S | R | I | I | I | S | 0.31 |
| <i>S. enteritidis</i> 46 | R | R | R | R | I | I | I | S | -    |
| <i>S. enteritidis</i> 47 | R | I | R | R | S | S | I | S | 0.13 |
| <i>S. enteritidis</i> 48 | R | R | R | R | S | S | I | S | 0.12 |
| <i>S. enteritidis</i> 49 | R | R | R | R | S | S | I | S | 6.25 |
| <i>S. enteritidis</i> 50 | R | R | R | I | R | S | I | R | -    |
| <i>S. enteritidis</i> 51 | R | R | R | S | R | S | I | R | -    |
| <i>S. enteritidis</i> 52 | R | R | R | S | R | R | I | R | 0.47 |
| <i>S. enteritidis</i> 53 | R | R | I | S | R | R | S | I | 1.34 |
| <i>S. enteritidis</i> 54 | R | R | R | I | R | I | S | S | -    |
| <i>S. enteritidis</i> 55 | R | R | R | I | R | I | S | S | 0.09 |
| <i>S. enteritidis</i> 56 | R | R | R | I | R | I | S | R | -    |
| <i>S. enteritidis</i> 57 | R | R | R | R | R | I | S | R | 1.09 |
| <i>S. enteritidis</i> 58 | R | R | R | R | S | S | R | S | 1.88 |
| <i>S. enteritidis</i> 59 | R | R | R | R | S | I | R | S | -    |
| <i>S. enteritidis</i> 60 | R | R | R | R | I | I | R | S | -    |
| <i>S. enteritidis</i> 61 | R | R | R | R | I | S | R | S | 0.94 |

|                          |   |   |   |   |   |   |   |   |      |
|--------------------------|---|---|---|---|---|---|---|---|------|
| <i>S. enteritidis</i> 62 | R | I | R | R | I | I | R | I | -    |
| <i>S. enteritidis</i> 63 | R | I | R | R | S | I | I | S | -    |
| <i>S. enteritidis</i> 64 | R | R | R | R | S | I | I | I | 0.13 |
| <i>S. enteritidis</i> 65 | R | R | R | R | R | I | I | R | 0.14 |
| <i>S. enteritidis</i> 66 | R | R | S | I | R | I | I | R | -    |
| <i>S. enteritidis</i> 67 | R | R | R | S | R | S | I | S | 1.56 |
| <i>S. enteritidis</i> 68 | R | R | R | I | R | S | I | S | 2.50 |
| <i>S. enteritidis</i> 69 | R | R | R | R | R | R | S | R | 1.22 |
| <i>S. enteritidis</i> 70 | R | R | R | R | R | S | S | R | 0.08 |
| <i>S. enteritidis</i> 71 | R | I | R | S | R | I | I | I | 0.25 |
| <i>S. enteritidis</i> 72 | R | R | R | R | R | I | I | I | -    |

Note: PEN, Penicillin; DOX, Doxycycline hydrochloride; FFC, Florfenicol; ENR, Enrofloxacin; CIP, Ciprofloxacin; CTX, Cefotaxime; NEO, Neomycin; CRO, Ceftriaxone; R, resistance; I, intermediate; S, sensitive; -, no lysis.
